# Supplementary material for: Dynamics studies for the multi-well and multi-channel reaction of OH with C2H2 on a full-dimensional global potential energy surface
Source: Royal Society of Chemistry journal article supplement (doi:10.1039/d3cp05811e), 2024-01-01
Supplement: d3cp05811e1.pdf [file d3cp05811e1.pdf]

## Supporting Information

Dynamics studies for the multi-well and multi-channel reaction of OH  
with C<sub>2</sub>H<sub>2</sub> on a full-dimensional global potential energy surface

Shuwen Zhang,<sup>a</sup> Qixin Chen,<sup>a</sup> Lidong Zhang,<sup>b\*</sup> Jun Li,<sup>c\*</sup> Xixi Hu<sup>d, e\*</sup> and Daiqian  
Xie<sup>a, e</sup>

<sup>a</sup> *Institute of Theoretical and Computational Chemistry, Key Laboratory of  
Mesoscopic Chemistry, School of Chemistry and Chemical Engineering, Nanjing  
University, Nanjing 210023, China*

<sup>b</sup> *National Synchrotron Radiation Laboratory, University of Science and Technology  
of China, Hefei 230029, China; State Key Laboratory of Fire Science, University of  
Science and Technology of China, Hefei 230026, China*

<sup>c</sup> *School of Chemistry and Chemical Engineering & Chongqing Key Laboratory of  
Theoretical and Computational Chemistry, Chongqing University, Chongqing 401331,  
China*

<sup>d</sup> *Kuang Yaming Honors School, Nanjing University, Nanjing 210023, China*

<sup>e</sup> *Hefei National Laboratory, Hefei 230088, China*

**Table S1.** Comparison of the energies (kcal/mol) of different basis sets at stationary points for the  $C_2H_2+OH$  reaction. The geometries of stationary points were based on the geometry optimization results under the UCCSD(T)-F12b/cc-pVTZ-F12 method and the energies are relative to the corresponding reactant energies.

| Basis set   | R       | P1      | P2      | P3      | P4      | P5      | Int1a   |
|-------------|---------|---------|---------|---------|---------|---------|---------|
| cc-pVDZ-F12 | 0.000   | 13.800  | 13.229  | -17.620 | -20.791 | -56.443 | -35.504 |
| cc-pVTZ-F12 | 0.000   | 13.808  | 13.070  | -17.486 | -20.664 | -55.704 | -35.617 |
| cc-pVQZ-F12 | 0.000   | 13.670  | 12.911  | -17.464 | -20.660 | -55.567 | -35.731 |
| aug-cc-pV5Z | 0.000   | 13.633  | 12.875  | -17.432 | -20.651 | -55.485 | -35.778 |
| Basis set   | Int1b   | Int1c   | Int1d   | Int2    | Int3    | Int4    | TS1     |
| cc-pVDZ-F12 | -34.086 | -33.061 | -32.374 | -62.910 | -39.493 | -70.044 | 0.747   |
| cc-pVTZ-F12 | -34.206 | -33.159 | -32.446 | -62.974 | -39.549 | -69.980 | 0.631   |
| cc-pVQZ-F12 | -34.316 | -33.268 | -32.552 | -63.003 | -39.634 | -69.981 | 0.580   |
| aug-cc-pV5Z | -34.360 | -33.321 | -32.597 | -63.034 | -39.670 | -69.997 | 0.588   |
| Basis set   | TS2     | TS3     | TS4a    | TS4b    | TS5a    | TS5b    | TS6     |
| cc-pVDZ-F12 | 19.464  | 2.753   | 14.145  | 16.530  | 15.781  | 17.656  | -1.671  |
| cc-pVTZ-F12 | 19.234  | 2.485   | 13.815  | 16.160  | 15.459  | 17.328  | -1.887  |
| cc-pVQZ-F12 | 19.152  | 2.439   | 13.688  | 16.023  | 15.318  | 17.172  | -1.947  |
| aug-cc-pV5Z | 19.118  | 2.423   | 13.633  | 15.964  | 15.279  | 17.130  | -1.969  |
| Basis set   | TS7     | TS8     | TS9     | TS10    | TS11    | TS12    | TS13    |
| cc-pVDZ-F12 | -19.591 | -14.688 | 15.042  | 37.898  | 15.935  | -2.929  | -18.096 |
| cc-pVTZ-F12 | -19.826 | -14.721 | 14.946  | 37.728  | 15.630  | -3.022  | -18.146 |
| cc-pVQZ-F12 | -19.869 | -14.713 | 14.915  | 37.682  | 15.488  | -3.062  | -18.166 |
| aug-cc-pV5Z | -19.912 | -14.714 | 14.900  | 37.656  | 15.451  | -3.067  | -18.171 |
| Basis set   | TS14    | TS15    | TS16    | TS17    | TS18    | TS19    | C1      |
| cc-pVDZ-F12 | -51.025 | -5.232  | -31.210 | -30.162 | -29.962 | -28.905 | -3.031  |
| cc-pVTZ-F12 | -50.570 | -5.263  | -31.423 | -30.244 | -30.027 | -29.085 | -3.061  |
| cc-pVQZ-F12 | -50.497 | -5.249  | -31.580 | -30.339 | -30.118 | -29.233 | -3.019  |
| aug-cc-pV5Z | -50.450 | -5.249  | -31.630 | -30.386 | -30.161 | -29.286 | -3.032  |

**Table S2.** Harmonic vibrational frequencies (cm<sup>-1</sup>) of the stationary points for the C<sub>2</sub>H<sub>2</sub>+OH reaction.

| Species                       | Methods          | Frequencies                                                                                           |
|-------------------------------|------------------|-------------------------------------------------------------------------------------------------------|
| C <sub>2</sub> H <sub>2</sub> | PES              | 3499.88, 3399.29, 2007.81, 744.10, 744.04, 604.65, 604.64                                             |
|                               | <i>Ab initio</i> | 3502.99, 3411.01, 2007.49, 748.88, 748.88, 616.29, 616.29                                             |
| OH                            | PES              | 3748.13                                                                                               |
|                               | <i>Ab initio</i> | 3740.38                                                                                               |
| C <sub>2</sub> H              | PES              | 3444.56, 1916.52, 351.20, 351.19                                                                      |
|                               | <i>Ab initio</i> | 3445.17, 2021.27, 351.02, 351.02                                                                      |
| H <sub>2</sub> O              | PES              | 3966.77, 3841.25, 1659.33                                                                             |
|                               | <i>Ab initio</i> | 3943.31, 3833.31, 1651.18                                                                             |
| HCCOH                         | PES              | 3816.54, 3472.86, 2233.24, 1277.49, 1066.46, 567.38, 561.88, 401.68, 376.86                           |
|                               | <i>Ab initio</i> | 3818.91, 3478.61, 2242.20, 1272.66, 1069.28, 623.14, 538.72, 401.78, 368.48                           |
| HCCO                          | PES              | 3330.23, 2066.87, 1223.18, 557.09, 501.11, 499.99                                                     |
|                               | <i>Ab initio</i> | 3325.18, 2061.97, 1226.78, 570.72, 515.73, 490.58                                                     |
| H <sub>2</sub>                | PES              | 4419.08                                                                                               |
|                               | <i>Ab initio</i> | 4401.22                                                                                               |
| OCCH <sub>2</sub>             | PES              | 3293.57, 3192.14, 2187.64, 1416.00, 1150.85, 1017.39, 585.04, 512.07, 434.02                          |
|                               | <i>Ab initio</i> | 3303.83, 3195.51, 2194.56, 1414.05, 1154.16, 991.11, 587.81, 518.70, 435.60                           |
| CH <sub>3</sub>               | PES              | 3296.18, 3296.13, 3121.74, 1427.62, 1427.60, 489.72                                                   |
|                               | <i>Ab initio</i> | 3304.57, 3304.37, 3121.04, 1421.72, 1421.69, 508.79                                                   |
| CO                            | PES              | 2166.66                                                                                               |
|                               | <i>Ab initio</i> | 2164.92                                                                                               |
| Int1a                         | PES              | 3810.09, 3308.99, 3134.69, 1666.59, 1378.33, 1253.34, 1104.21, 812.76, 807.07, 584.43, 476.18, 452.16 |
|                               | <i>Ab initio</i> | 3814.53, 3300.83, 3139.11, 1658.61, 1364.07, 1252.57, 1109.22, 825.96, 797.81, 587.43, 475.99, 452.88 |
| Int1b                         | PES              | 3814.07, 3286.21, 3176.99, 1639.60, 1377.01, 1258.39, 1060.32, 887.98, 836.01, 575.23, 452.78, 431.15 |
|                               | <i>Ab initio</i> | 3822.31, 3279.77, 3198.19, 1641.33, 1363.01, 1254.50, 1065.14, 898.85, 814.50, 580.66, 444.83, 417.82 |
| Int1c                         | PES              | 3884.02, 3298.47, 3095.31, 1695.28, 1332.91, 1301.09, 1109.14, 830.18, 764.85, 620.97, 484.07, 268.11 |
|                               | <i>Ab initio</i> | 3874.45, 3299.23, 3091.37, 1692.95, 1315.93, 1276.27, 1120.95, 796.15, 791.43, 617.22, 488.23, 259.48 |
| Int1d                         | PES              | 3849.10, 3280.91, 3147.61, 1677.16, 1336.69, 1263.67, 1078.68, 852.89, 845.82, 614.84, 430.41, 246.08 |
|                               | <i>Ab initio</i> | 3862.23, 3291.90, 3153.76, 1675.52, 1328.74, 1258.71, 1082.57, 864.13, 831.65, 614.41, 439.85, 230.00 |

|      |                  |                                                                                                             |
|------|------------------|-------------------------------------------------------------------------------------------------------------|
| Int2 | PES              | 3272.22, 3143.65, 2972.90, 1591.55, 1501.35, 1396.00, 1180.73,<br>987.62, 984.02, 691.51, 491.08, 420.58    |
|      | <i>Ab initio</i> | 3276.58, 3155.51, 2983.46, 1576.88, 1475.67, 1401.30, 1162.29,<br>972.47, 965.32, 735.32, 500.13, 426.21    |
| Int3 | PES              | 3822.81, 3208.64, 3068.96, 1690.48, 1422.99, 1284.62, 1114.09,<br>933.37, 773.93, 712.52, 421.97, 107.97    |
|      | <i>Ab initio</i> | 3823.94, 3250.27, 3116.13, 1697.19, 1409.49, 1244.39, 1131.33,<br>961.52, 814.58, 629.84, 443.04, 317.88    |
| Int4 | PES              | 3256.21, 3019.29, 3008.52, 1890.11, 1505.66, 1461.75, 1336.41,<br>1058.87, 870.52, 868.41, 417.51, 183.64   |
|      | <i>Ab initio</i> | 3144.44, 3138.16, 3037.17, 1901.77, 1467.49, 1465.07, 1361.86,<br>1055.73, 959.24, 867.76, 469.02, 98.65    |
| TS1  | PES              | 3758.23, 3469.42, 3380.02, 1897.77, 789.24, 747.21, 704.29,<br>588.99, 557.83, 242.10, 91.56, 412.66i       |
|      | <i>Ab initio</i> | 3754.36, 3476.45, 3398.34, 1908.13, 798.28, 738.15, 715.55,<br>603.52, 588.18, 237.79, 106.45, 402.72i      |
| TS2  | PES              | 3786.08, 3444.40, 1990.84, 1576.86, 1049.76, 570.30, 568.32,<br>423.30, 268.40, 120.42, 84.26, 1216.71i     |
|      | <i>Ab initio</i> | 3783.18, 3437.62, 2028.71, 1627.14, 1166.53, 620.40, 596.44,<br>542.09, 327.86, 162.12, 112.35, 1330.53i    |
| TS3  | PES              | 3264.64, 3185.46, 1955.49, 1409.77, 1304.80, 1118.08, 989.86,<br>892.09, 845.53, 658.32, 272.38, 2366.74i   |
|      | <i>Ab initio</i> | 3190.43, 3145.17, 2008.99, 1406.61, 1304.95, 1154.99, 1093.43,<br>1004.93, 892.37, 797.50, 315.62, 2165.96i |
| TS4a | PES              | 3854.60, 3220.37, 2280.82, 1717.16, 1249.86, 1006.69, 773.65,<br>569.38, 521.25, 369.05, 262.91, 1749.66i   |
|      | <i>Ab initio</i> | 3829.47, 3180.40, 2313.63, 1786.67, 1259.74, 1012.72, 813.68,<br>602.26, 544.58, 464.69, 341.72, 1768.64i   |
| TS4b | PES              | 3689.56, 3186.80, 2131.80, 1732.66, 1288.62, 978.75, 716.15,<br>515.01, 485.93, 293.64, 186.29, 2000.17i    |
|      | <i>Ab initio</i> | 3709.56, 3173.30, 2324.33, 1777.08, 1283.77, 992.73, 789.86,<br>581.73, 514.34, 413.40, 307.24, 1830.44i    |
| TS5a | PES              | 3799.66, 3436.90, 2115.63, 1272.26, 1058.37, 595.34, 559.28,<br>529.14, 466.17, 451.64, 215.28, 784.06i     |
|      | <i>Ab initio</i> | 3783.63, 3462.34, 2147.53, 1280.27, 1062.79, 608.65, 543.94,<br>531.27, 449.24, 413.05, 246.45, 752.75i     |
| TS5b | PES              | 3771.75, 3421.67, 2087.20, 1287.95, 1053.14, 599.25, 577.00,<br>537.49, 476.30, 441.95, 225.29, 937.04i     |
|      | <i>Ab initio</i> | 3802.97, 3457.02, 2135.01, 1271.35, 1053.62, 595.81, 538.43,<br>516.69, 453.27, 417.38, 179.69, 880.49i     |
| TS6  | PES              | 3292.34, 3107.45, 2383.35, 1617.31, 1501.17, 1101.56, 986.23,<br>788.51, 598.90, 485.43, 362.64, 1832.00i   |
|      | <i>Ab initio</i> | 3270.06, 3138.88, 2435.31, 1671.57, 1407.87, 1123.11, 955.37,<br>742.30, 558.16, 428.93, 389.46, 2026.53i   |

|      |                  |                                                                                                             |
|------|------------------|-------------------------------------------------------------------------------------------------------------|
| TS7  | PES              | 3378.96, 3125.76, 2008.97, 1852.76, 1491.52, 1224.39, 1120.71,<br>1069.18, 857.55, 617.39, 469.70, 1517.37i |
|      | <i>Ab initio</i> | 3256.09, 3075.76, 1925.88, 1822.21, 1449.78, 1211.19, 1110.63,<br>1034.10, 829.03, 630.85, 439.10, 1596.02i |
| TS8  | PES              | 3301.73, 3163.02, 2064.33, 1432.63, 1140.47, 964.43, 637.24,<br>612.34, 542.58, 521.66, 233.20, 991.57i     |
|      | <i>Ab initio</i> | 3303.74, 3178.27, 2097.96, 1416.95, 1129.77, 1008.71, 639.70,<br>615.06, 533.19, 502.28, 316.99, 1017.16i   |
| TS9  | PES              | 3269.36, 3107.54, 1737.95, 1439.38, 1365.43, 1133.36, 1008.86,<br>952.13, 746.89, 592.82, 349.62, 2484.85i  |
|      | <i>Ab initio</i> | 3236.47, 3113.06, 1773.10, 1456.31, 1416.82, 1120.87, 1007.07,<br>976.78, 773.95, 578.88, 324.41, 2495.55i  |
| TS10 | PES              | 3809.29, 3326.13, 1774.42, 1608.02, 1216.07, 1036.78, 843.97,<br>669.60, 637.52, 521.01, 476.75, 1904.01i   |
|      | <i>Ab initio</i> | 3758.35, 3302.46, 1765.49, 1599.33, 1209.83, 1028.16, 845.51,<br>701.11, 646.17, 513.84, 469.25, 1895.38i   |
| TS11 | PES              | 3780.94, 3458.99, 2190.71, 1275.35, 1081.31, 730.38, 576.00,<br>540.64, 437.14, 267.83, 68.55, 778.30i      |
|      | <i>Ab initio</i> | 3810.04, 3439.89, 2166.21, 1264.56, 1070.82, 704.61, 611.74,<br>482.70, 377.99, 248.76, 82.71, 713.89i      |
| TS12 | PES              | 3258.24, 3122.54, 1995.14, 1399.90, 1142.83, 974.46, 746.76,<br>700.35, 635.91, 357.87, 183.81, 1839.78i    |
|      | <i>Ab initio</i> | 3263.90, 3138.50, 2005.60, 1411.03, 1131.41, 1000.94, 751.08,<br>654.74, 520.79, 349.30, 260.92, 1942.88i   |
| TS13 | PES              | 3286.24, 3216.89, 2167.60, 1438.54, 1118.53, 940.70, 777.54,<br>596.41, 497.46, 425.18, 285.43, 733.76i     |
|      | <i>Ab initio</i> | 3283.75, 3180.65, 2172.13, 1406.60, 1120.01, 1014.67, 759.21,<br>565.91, 528.75, 416.81, 288.97, 707.43i    |
| TS14 | PES              | 3285.32, 3240.26, 3091.52, 2033.82, 1430.57, 1399.93, 841.93,<br>525.83, 509.06, 248.71, 82.19, 408.17i     |
|      | <i>Ab initio</i> | 3279.46, 3264.68, 3100.10, 2036.95, 1430.93, 1424.09, 853.17,<br>555.07, 505.07, 255.76, 32.09, 403.78i     |
| TS15 | PES              | 3279.62, 2154.28, 1775.03, 1240.48, 1042.74, 806.80, 630.15,<br>564.85, 529.86, 335.47, 264.03, 1373.64i    |
|      | <i>Ab initio</i> | 3312.43, 2158.84, 1790.16, 1230.50, 1063.48, 849.27, 672.81,<br>568.74, 546.55, 313.55, 267.15, 1357.11i    |
| TS16 | PES              | 3794.54, 3399.80, 3131.46, 1639.79, 1378.89, 1233.07, 1047.76,<br>845.22, 519.39, 474.10, 434.51, 655.15i   |
|      | <i>Ab initio</i> | 3813.51, 3423.61, 3145.01, 1649.07, 1369.75, 1235.29, 1051.79,<br>859.96, 524.75, 471.49, 434.33, 627.52i   |
| TS17 | PES              | 3848.73, 3275.05, 3075.48, 1648.60, 1322.62, 1231.65, 1095.77,<br>838.09, 774.93, 671.94, 468.98, 392.06i   |
|      | <i>Ab initio</i> | 3845.37, 3278.49, 3079.86, 1645.42, 1298.05, 1245.77, 1104.54,<br>805.30, 789.34, 669.03, 472.13, 381.04i   |

|      |                  |                                                                                                           |
|------|------------------|-----------------------------------------------------------------------------------------------------------|
| TS18 | PES              | 3837.53, 3283.73, 3146.66, 1625.63, 1313.49, 1222.14, 1044.43,<br>893.93, 862.19, 651.71, 415.09, 339.75i |
|      | <i>Ab initio</i> | 3840.68, 3272.82, 3160.40, 1623.53, 1311.53, 1234.72, 1049.82,<br>873.41, 859.67, 668.09, 430.04, 339.22i |
| TS19 | PES              | 3843.21, 3406.74, 3081.13, 1672.27, 1336.92, 1253.20, 1052.21,<br>801.18, 520.25, 481.58, 282.23, 669.68i |
|      | <i>Ab initio</i> | 3853.21, 3430.66, 3086.71, 1684.16, 1333.61, 1254.61, 1060.30,<br>820.27, 530.31, 475.74, 274.44, 637.37i |
| C1   | PES              | 3711.28, 3496.55, 3391.01, 2007.36, 763.47, 751.85, 622.89,<br>616.60, 333.45, 228.34, 128.24, 72.71      |
|      | <i>Ab initio</i> | 3686.49, 3494.36, 3401.84, 2003.57, 764.77, 750.87, 636.72,<br>611.56, 391.62, 235.91, 118.86, 69.10      |

---

**Table S3.** Geometry parameters used to identify Int1 (Int1a-d), Int2, Int3, and Int4. Distances and angles are in units of angstrom and degree, respectively.

|                      | Int1a-d              |                                                                                              | Int2                 |                     |
|----------------------|----------------------|----------------------------------------------------------------------------------------------|----------------------|---------------------|
|                      | Equilibrium geometry | Value range                                                                                  | Equilibrium geometry | Value range         |
| $r_{C_1C_2}$         | 1.32                 | 0.99-1.65                                                                                    | $r_{C_1C_2}$         | 1.43<br>1.07-1.79   |
| $r_{C_1O}$           | 1.37                 | 1.02-1.71                                                                                    | $r_{C_1O}$           | 1.23<br>0.92-1.54   |
| $r_{C_1H_1}$         | 1.09                 | 0.81-1.36                                                                                    | $r_{C_1H_1}$         | 1.10<br>0.83-1.38   |
| $r_{C_2H_2}$         | 1.07                 | 0.81-1.35                                                                                    | $r_{C_2H_2}$         | 1.08<br>0.81-1.35   |
| $r_{OH_3}$           | 0.96                 | 0.72-1.20 and<br>$r_{OH_3} = \min(r_{C_1H_3}, r_{C_2H_3}, r_{H_1H_3}, r_{H_2H_3}, r_{OH_3})$ | $r_{C_2H_3}$         | 1.08<br>0.81-1.35   |
| $\theta_{OC_1C_2}$   | 125.0                | 90.0-165.0                                                                                   | $\theta_{OC_1C_2}$   | 123.0<br>90.0-165.0 |
| $\theta_{H_1C_1C_2}$ | 121.0                | 90.0-165.0                                                                                   | $\theta_{H_1C_1C_2}$ | 117.0<br>90.0-165.0 |
| $\theta_{C_1C_2H_2}$ | 137.0                | 90.0-180.0                                                                                   | $\theta_{C_1C_2H_2}$ | 121.0<br>90.0-165.0 |
|                      |                      |                                                                                              | $\theta_{C_1C_2H_3}$ | 119.0<br>90.0-165.0 |
|                      | Int3                 |                                                                                              | Int4                 |                     |
|                      | Equilibrium geometry | Value range                                                                                  | Equilibrium geometry | Value range         |
| $r_{C_1C_2}$         | 1.32                 | 0.99-1.65                                                                                    | $r_{C_1C_2}$         | 1.51<br>1.14-1.89   |
| $r_{C_1O}$           | 1.34                 | 1.00-1.67                                                                                    | $r_{C_1O}$           | 1.18<br>0.89-1.48   |
| $r_{C_2H_1}$         | 1.08                 | 0.81-1.36                                                                                    | $r_{C_2H_1}$         | 1.08<br>0.81-1.37   |
| $r_{C_2H_2}$         | 1.09                 | 0.81-1.36                                                                                    | $r_{C_2H_2}$         | 1.10<br>0.81-1.37   |
| $r_{OH_3}$           | 0.96                 | 0.72-1.20 and                                                                                | $r_{C_2H_3}$         | 1.10<br>0.81-1.37   |

$$r_{\text{OH}_3} = \min(r_{\text{C}_1\text{H}_3}, r_{\text{C}_2\text{H}_3}, r_{\text{H}_1\text{H}_3}, r_{\text{H}_2\text{H}_3}, r_{\text{OH}_3})$$

|                                           |       |            |                                           |       |            |
|-------------------------------------------|-------|------------|-------------------------------------------|-------|------------|
| $\theta_{\text{OC}_1\text{C}_2}$          | 131.0 | 90.0-165.0 | $\theta_{\text{OC}_1\text{C}_2}$          | 129.0 | 90.0-165.0 |
| $\theta_{\text{C}_1\text{C}_2\text{H}_1}$ | 120.0 | 90.0-165.0 | $\theta_{\text{C}_1\text{C}_2\text{H}_1}$ | 110.0 | 90.0-165.0 |
| $\theta_{\text{C}_1\text{C}_2\text{H}_2}$ | 120.0 | 90.0-165.0 | $\theta_{\text{C}_1\text{C}_2\text{H}_2}$ | 108.0 | 90.0-165.0 |
|                                           |       |            | $\theta_{\text{C}_1\text{C}_2\text{H}_3}$ | 108.0 | 90.0-165.0 |

---



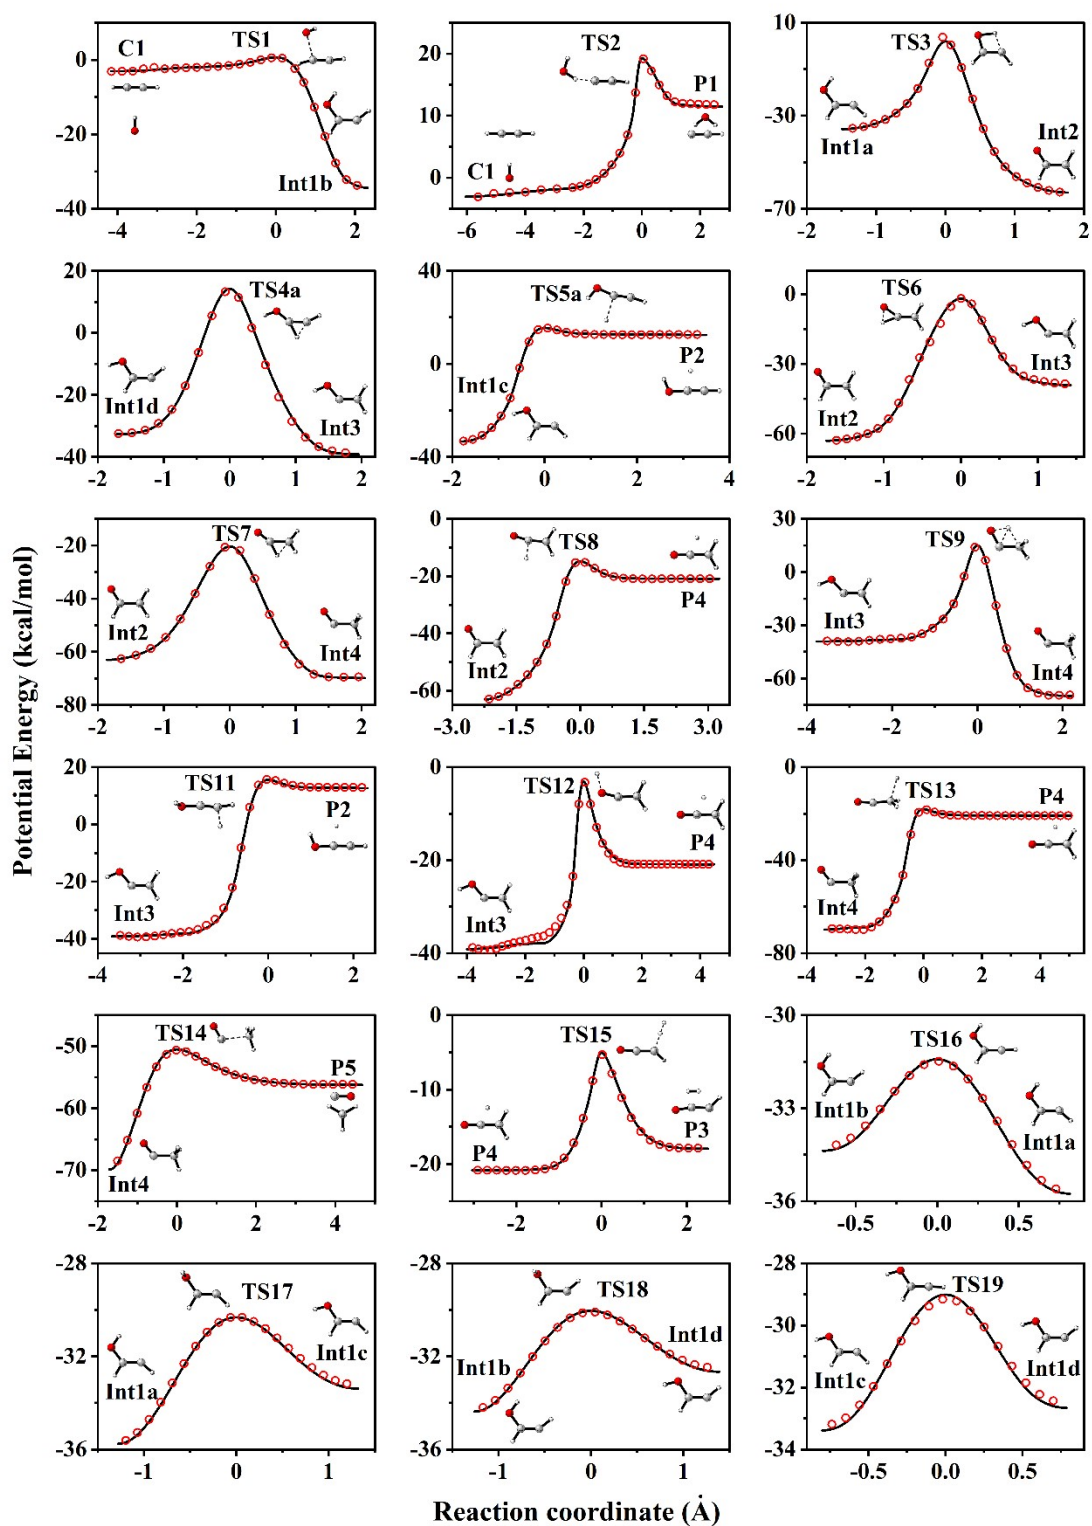

**Figure S1.** Comparison of the potential energies along the reaction paths on the PES (solid line) and the corresponding *ab initio* energies (red circle). The reaction path is defined as the steepest descent path through the mass-scaled coordinates from the saddle point to the minimum.

**r-PES**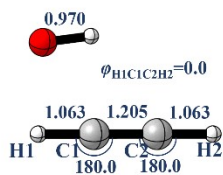**P1-PES**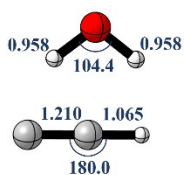**P2-PES**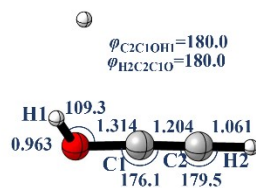**P3-PES**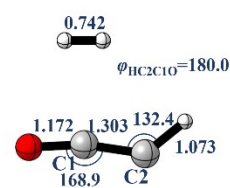**r-ab initio**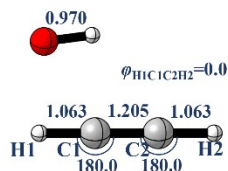**P1-ab initio**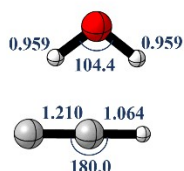**P2-ab initio**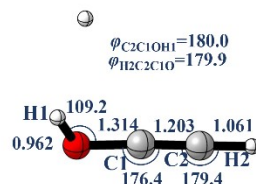**P3-ab initio**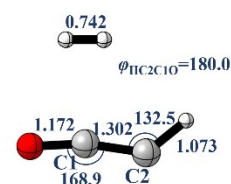**P4-PES**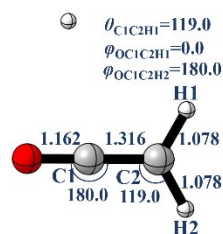**P5-PES**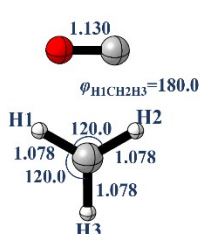**Int1a-PES**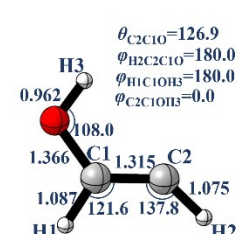**Int1b-PES**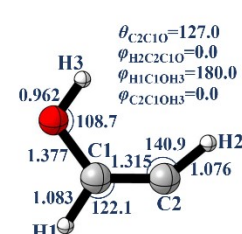**P4-ab initio**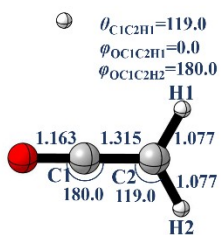**P5-ab initio**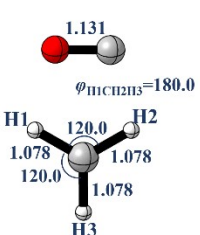**Int1a-ab initio**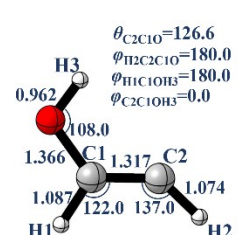**Int1b-ab initio**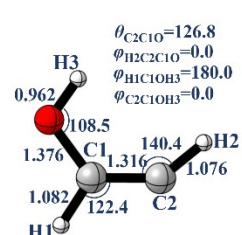**Int1c-PES**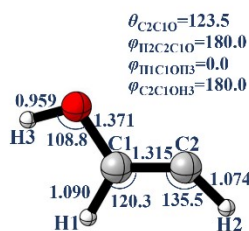**Int1d-PES**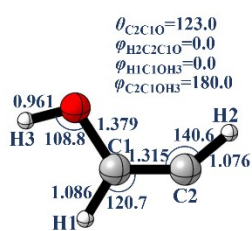**Int2-PES**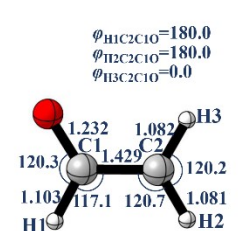**Int3-PES**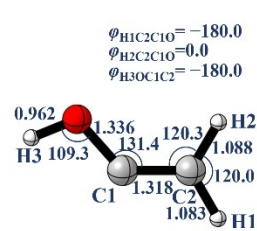**Int1c-ab initio**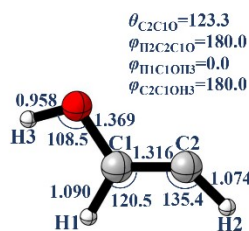**Int1d-ab initio**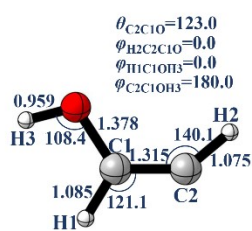**Int2-ab initio**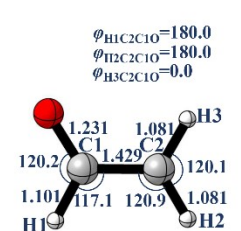**Int3-ab initio**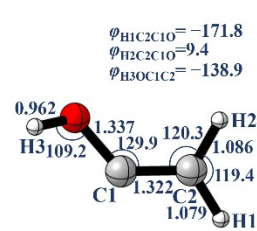

**Int4-PES**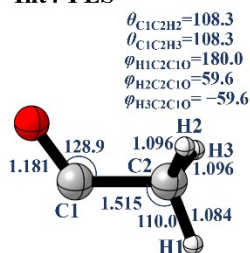**TS1-PES**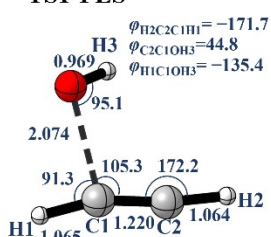**TS2-PES**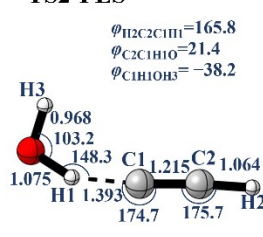**TS3-PES**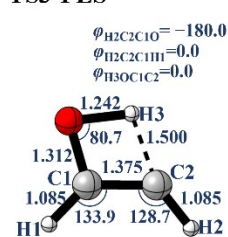**Int4-ab initio**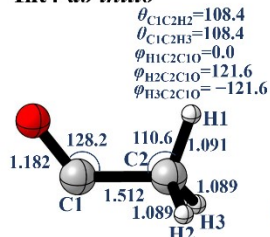**TS1-ab initio**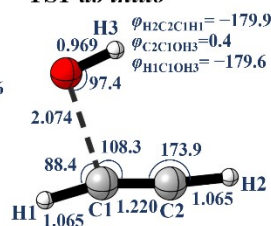**TS2-ab initio**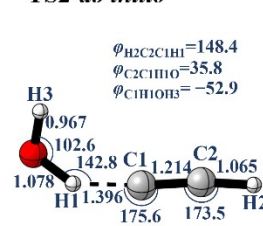**TS3-ab initio**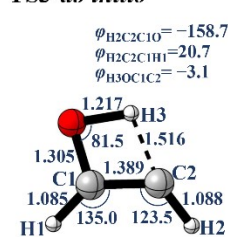**TS4a-PES**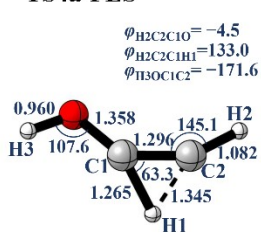**TS4b-PES**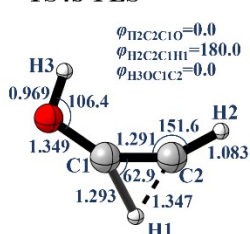**TS5a-PES**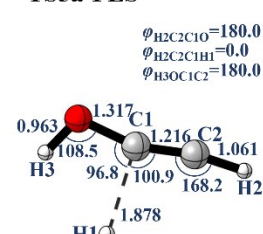**TS5b-PES**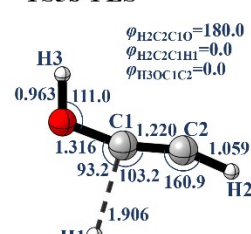**TS4a-ab initio**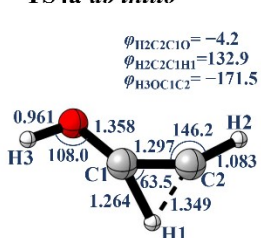**TS4b-ab initio**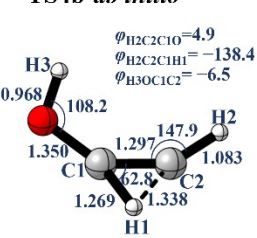**TS5a-ab initio**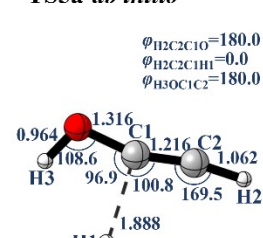**TS5b-ab initio**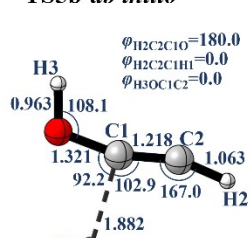**TS6-PES**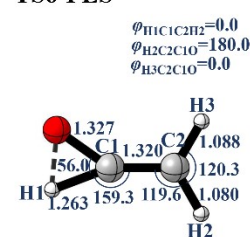**TS7-PES**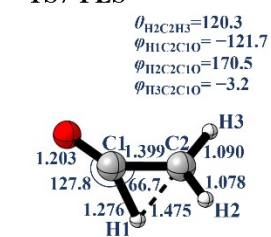**TS8-PES**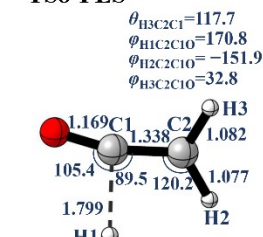**TS9-PES**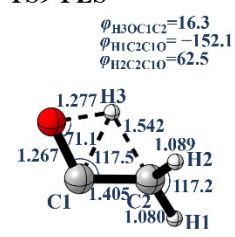**TS6-ab initio**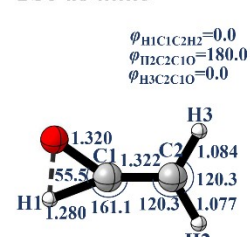**TS7-ab initio**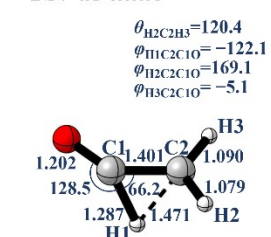**TS8-ab initio**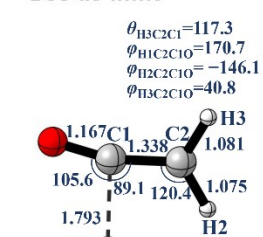**TS9-ab initio**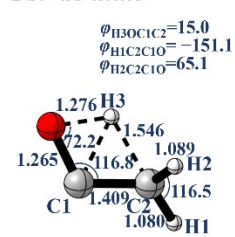



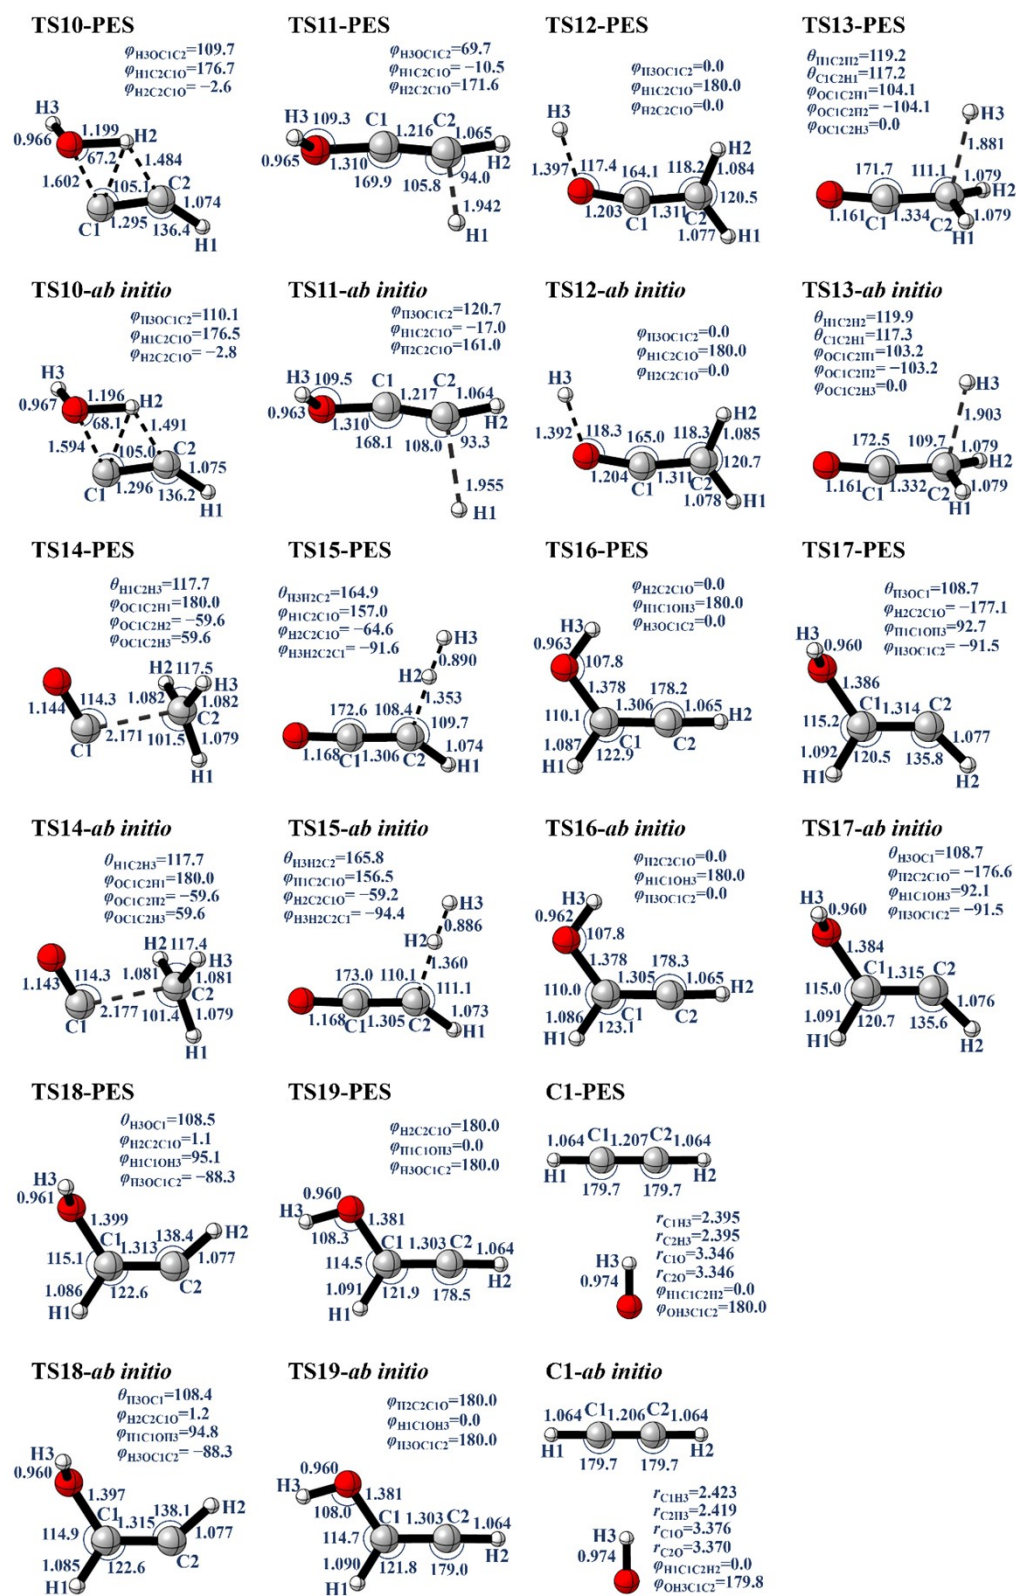

**Figure S2.** The geometry parameters of the stationary points. The geometric values of the PIP-NN PES and *ab initio* calculations are shown in the figure. All distances are in angstrom and angles are in degree.
